# Supplementary material for: Combinatorial approaches for mitigating resistance to KRAS-targeted therapies
Source: PubMed Central journal article supplement (PMC9555794; doi:10.1042/bcj20220440), 2022-09-23
Supplement: BCJ-479-1985-s1.pdf [file BCJ-479-1985-s1.pdf]

## Combinatorial approaches for mitigating resistance to KRAS-targeted therapies

Hannah R. Warren<sup>1</sup>, Sarah J. Ross<sup>2</sup>, Paul D. Smith<sup>2</sup>, Judy M. Coulson<sup>1,3</sup> and Ian A. Prior<sup>1,3</sup>

### Supplementary Material

#### FIGURE LEGENDS

**Supplementary Figure 1.** *Sensitivity of NCI-H358 cells to Ras targeted therapeutics.*

Antisense KRAS AZD4785 results in loss of KRAS and a concomitant decrease in Ras-MAP kinase output indicated by decreased DUSP6 expression. Higher sensitivity to drug is observed in 3D spheroid cell culture vs 2D culture following 7 days of incubation. Similar results are observed for the other drugs. Data are means  $\pm$ SD from three independent experiments. Calculated IC<sub>50</sub> and IC<sub>90</sub> concentrations are summarized in the table.

**Supplementary Figure 2:** *Re-activation of Ras effectors is KRAS<sup>G12C</sup> specific.* Acute

treatments with IC<sub>90</sub> concentrations of inhibitor were carried out in (A) naïve NCI-H1792 KRAS<sup>G12C</sup> cells and (B) naïve NCI-H1793 KRAS<sup>WT</sup> cells. Treatments were redosed every 48 hours. NCI-H1792 cells exhibited rapid re-activation of Ras effectors following acute inhibitor treatments, whereas NCI-H1793 cells showed minimal changes in pERK levels. Blots are representative of two independent experiments.

**Supplementary Figure 3.** *Dose responses of combination therapeutics in resistant*

*NCI-H358 cells.* Long-term resistant cell lines were treated with their previous IC<sub>90</sub> inhibitor doses in combination with dose responses of additional targeted inhibitors.

The change in confluency was recorded following 4 days of inhibitor treatment. Confluence data are means  $\pm$ SD from at least two independent experiments.

**Supplementary Figure 4.** *Synergy vs dose response matrices of triple combination therapeutics in resistant cells.* Synergy scores from double inhibitor combination assays were calculated using the Loewe model and plotted against % viability. Areas coloured blue indicate drug combinations that are synergistic. The final doses selected for triple combination analysis in Supplementary Figure 3 are indicated.

## Pathway inhibition

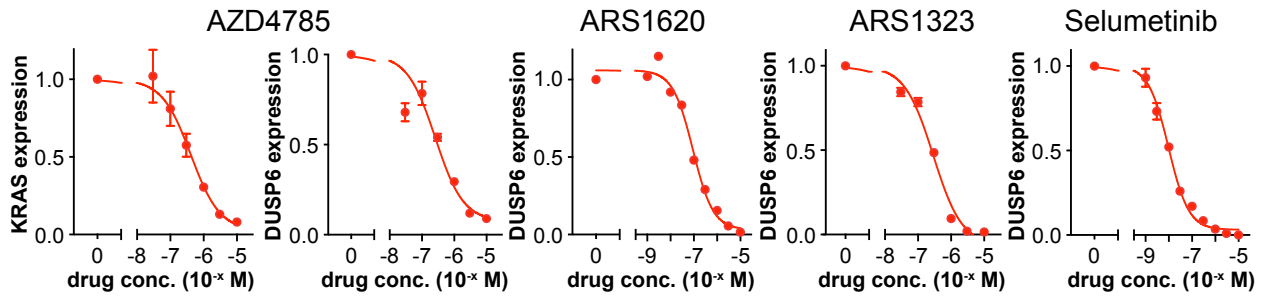

## Viability

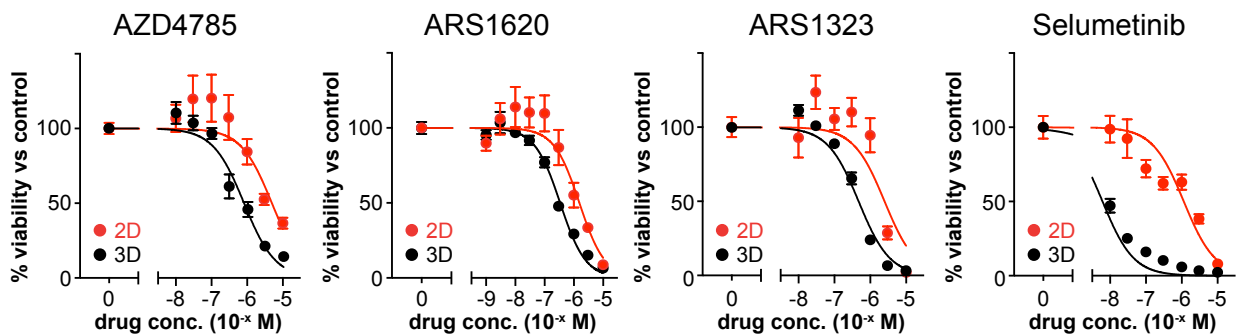

| Inhibitor   | Target               | Pathway inhibition    |                       | 2D viability          |                       | 3D viability          |                       |
|-------------|----------------------|-----------------------|-----------------------|-----------------------|-----------------------|-----------------------|-----------------------|
|             |                      | IC <sub>50</sub> (μM) | IC <sub>90</sub> (μM) | IC <sub>50</sub> (μM) | IC <sub>90</sub> (μM) | IC <sub>50</sub> (μM) | IC <sub>90</sub> (μM) |
| AZD4785     | KRAS                 | 0.42                  | 3.72                  | 4.95                  | 44.7                  | 0.79                  | 7.08                  |
| ARS1620     | KRAS <sup>G12C</sup> | 0.092                 | 0.83                  | 1.55                  | 13.8                  | 0.34                  | 3.09                  |
| ARS1323     | KRAS <sup>G12C</sup> | 0.29                  | 2.63                  | 2.5                   | 22.4                  | 0.48                  | 4.27                  |
| Selumetinib | MEK1/MEK2            | 0.0097                | 0.087                 | 1.1                   | 10.2                  | 0.0062                | 0.055                 |

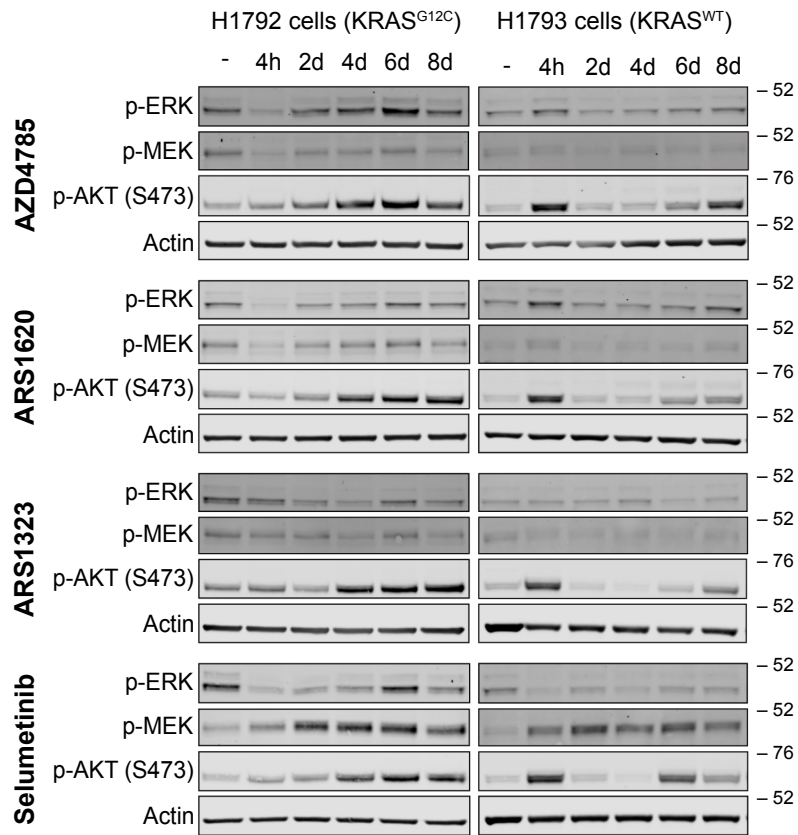

Supplementary Figure 2

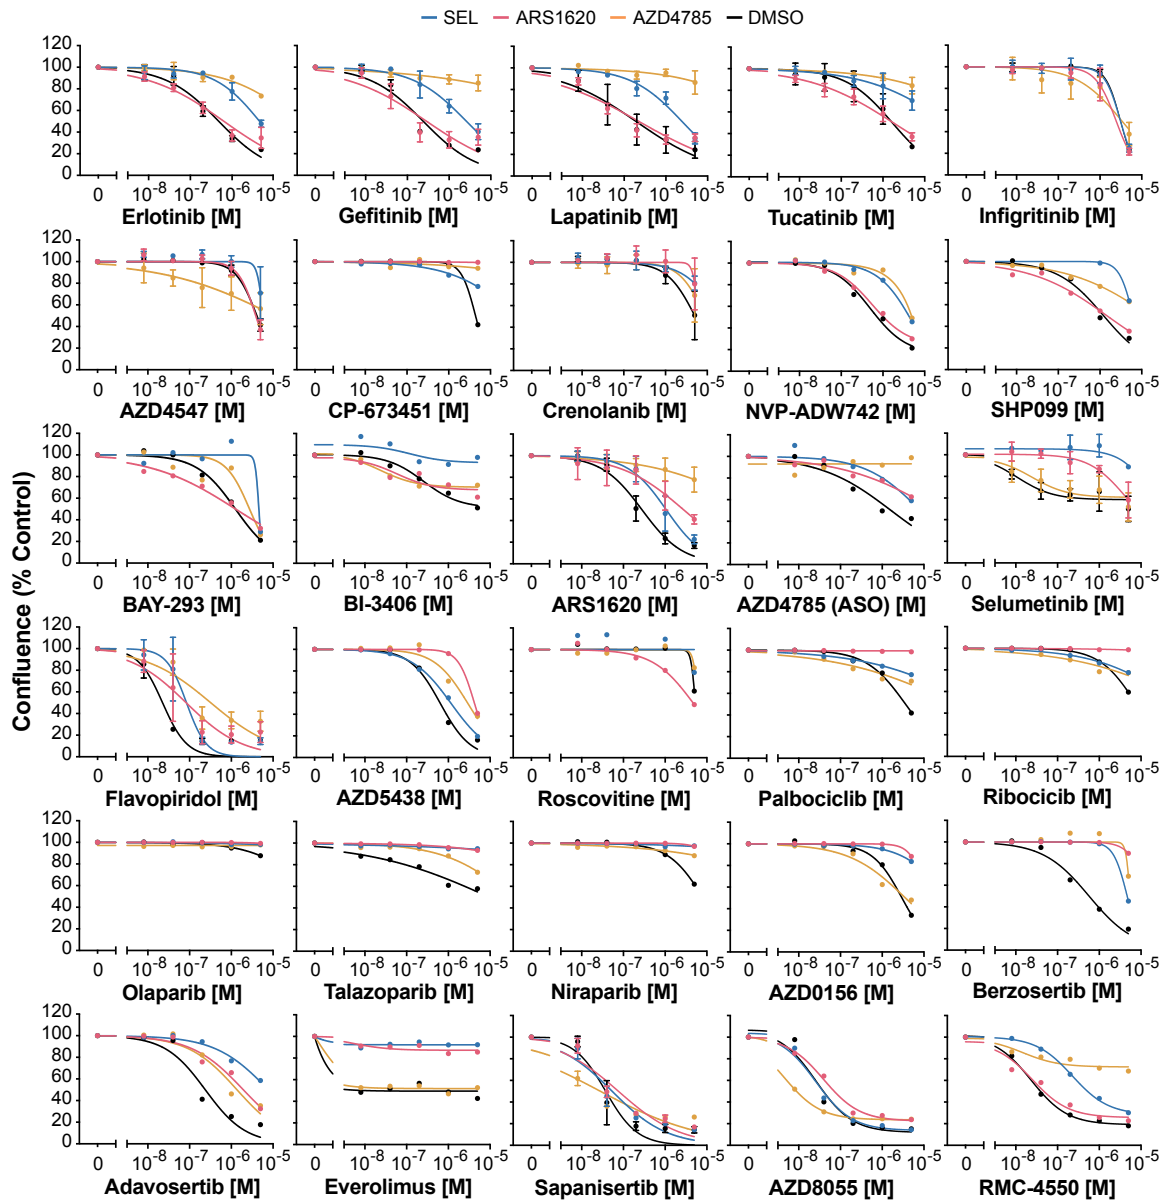

Supplementary Figure 3

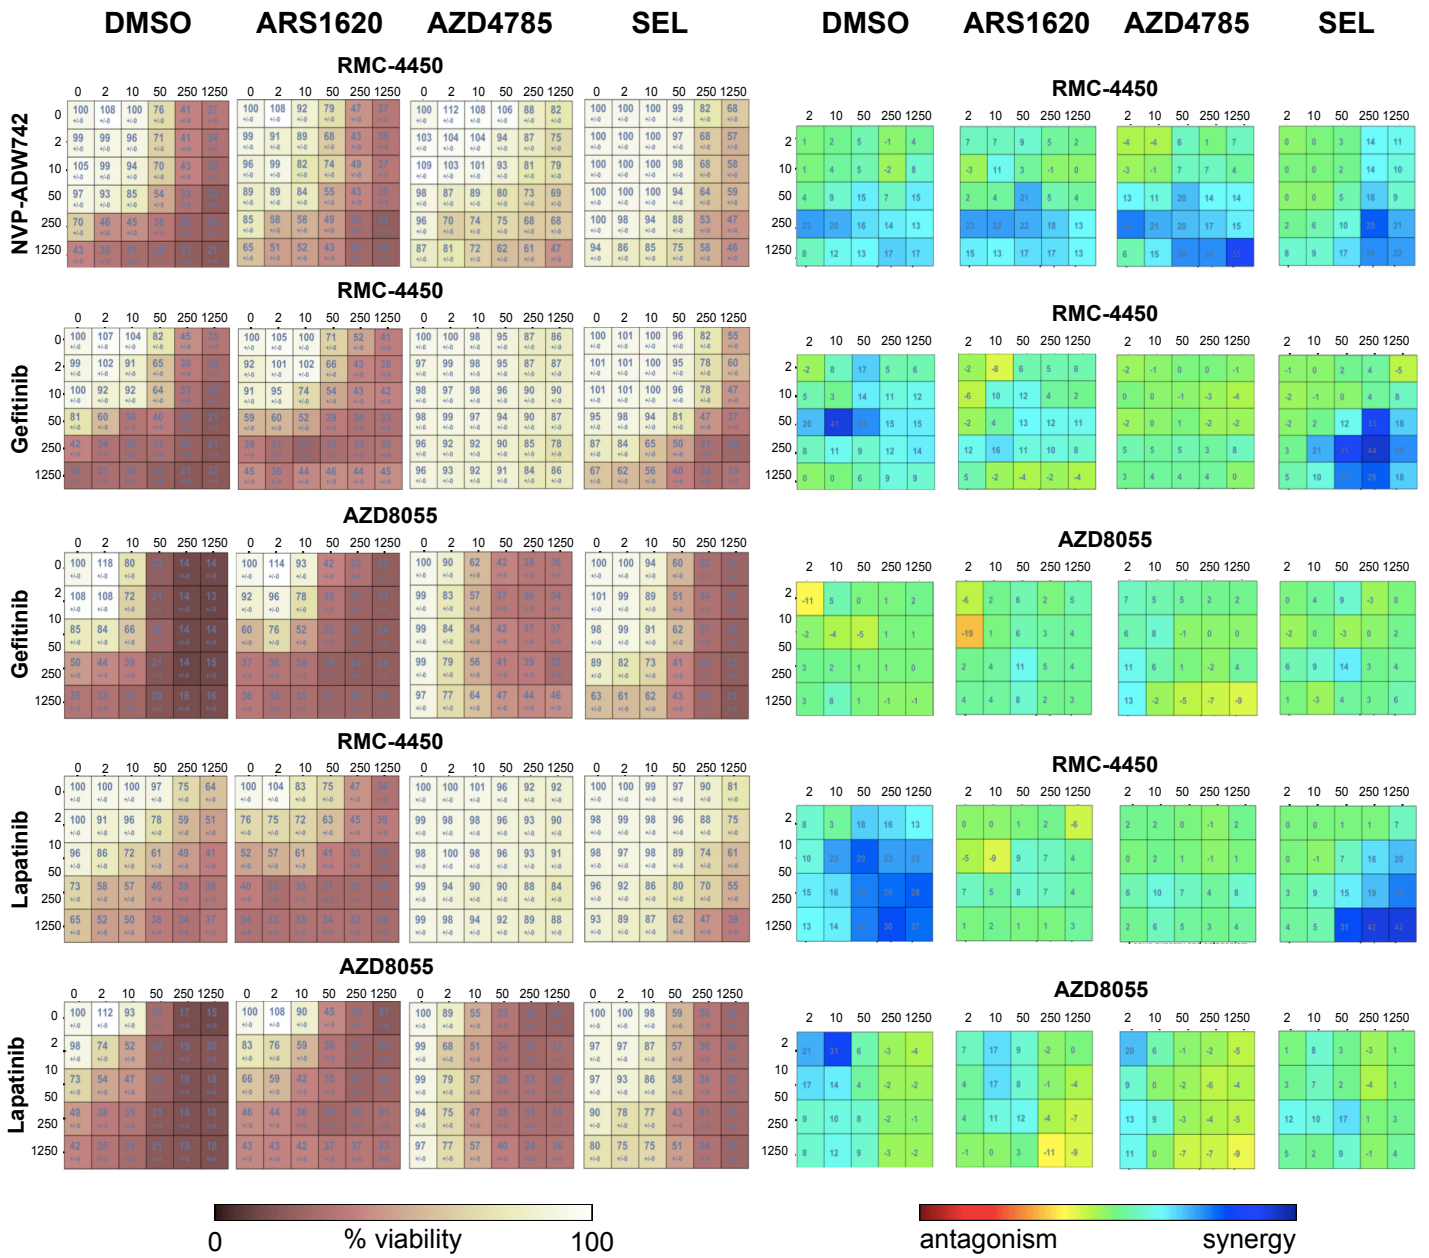

|            | DMSO | 830nM<br>ARS1620 | 2.34µM<br>AZD4785 | 87nM<br>SEL |
|------------|------|------------------|-------------------|-------------|
| NVP-ADW742 | 250  | 50               | 50                | 250         |
| RMC-4550   | 50   | 50               | 50                | 250         |
| Gefitinib  | 50   | 250              | 250               | 250         |
| RMC-4550   | 10   | 10               | 250               | 250         |
| Gefitinib  | 50   | 50               | 50                | 50          |
| AZD8055    | 50   | 50               | 50                | 50          |
| Lapatinib  | 50   | 50               | 50                | 250         |
| RMC4550    | 50   | 50               | 50                | 250         |
| Lapatinib  | 10   | 10               | 10                | 10          |
| AZD8055    | 10   | 10               | 10                | 10          |

Supplementary Figure 4
